# Supplementary material
Source: PubMed Central journal article supplement (PMC1831678)

## S4

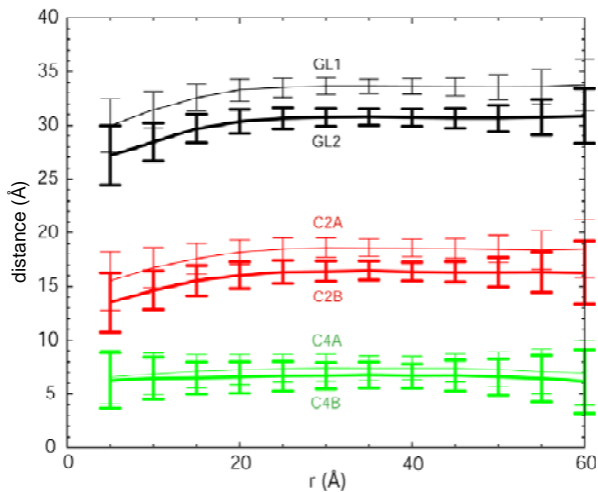

## VS

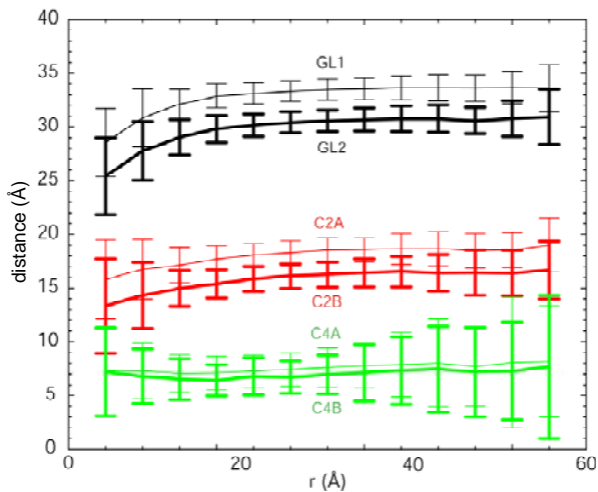

Supplement: pnas_0606822104_1.pdf [file pnas_0606822104_1.pdf]

# S4

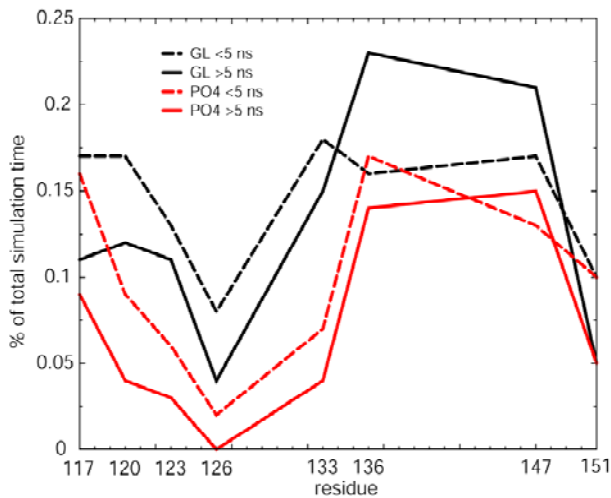

# VS

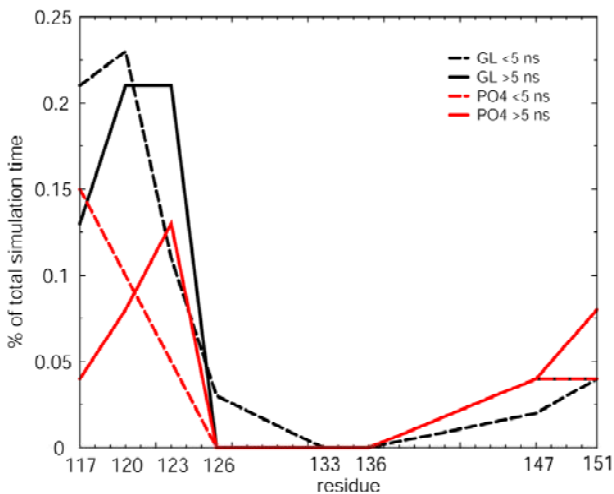

Supplement: pnas_0606822104_2.pdf [file pnas_0606822104_2.pdf]
